# Supplementary material for: A simple template-free approach to TiO2 hollow spheres with enhanced photocatalytic activity
Source: Royal Society of Chemistry journal article supplement (doi:10.1039/c0dt00053a), 2010-01-01
Supplement: c0dt00053a.pdf [file c0dt00053a.pdf]

**(Electronic Supplementary Information)**

## **Supporting Information**

### **A Simple Template-free Approach to TiO<sub>2</sub> Hollow Spheres with Enhanced Photocatalytic Activity**

**Jiaguo Yu,\* Jun Zhang**

State Key Laboratory of Advanced Technology for Materials Synthesis and  
Processing, Wuhan University of Technology, Wuhan 430070, P. R. China,  
Tel: 0086-27-87871029, Fax: 0086-27-87879468, E-mail: [jiaguoyu@yahoo.com](mailto:jiaguoyu@yahoo.com)

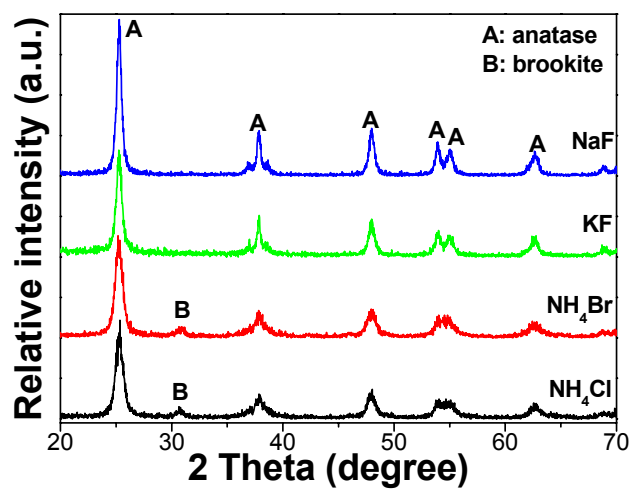

**Figure S1.** XRD patterns of the samples prepared with different additives at 180°C for 12 h.

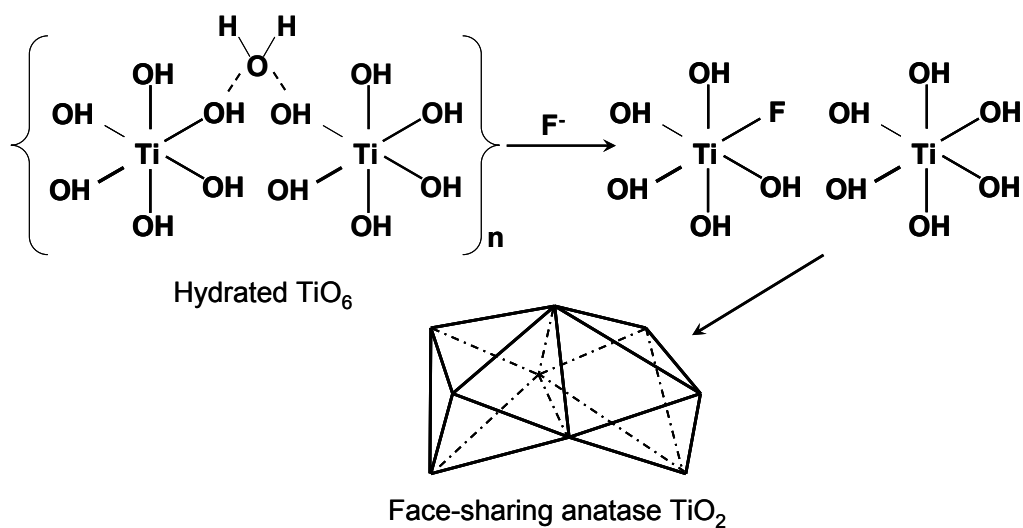

**Figure S2.** Reaction scheme for hydrothermal crystallization of anatase.

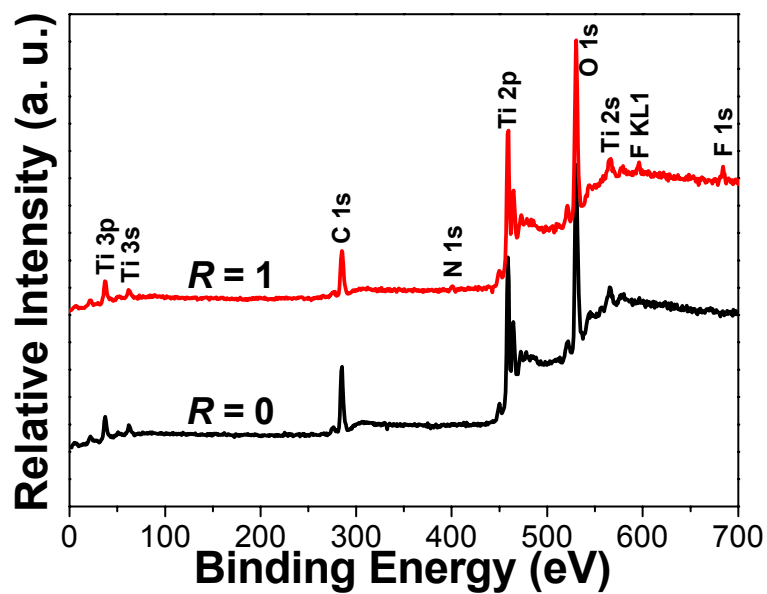

Figure S3. XPS survey spectra of the  $\text{TiO}_2$  samples prepared at  $R = 0$  and 1, respectively.

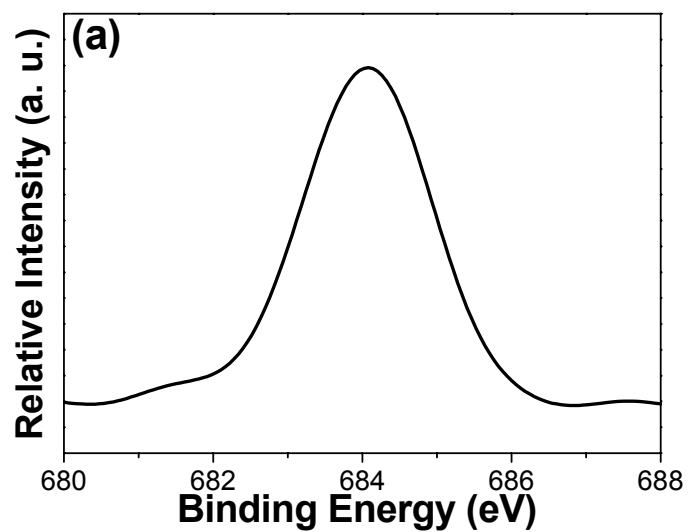

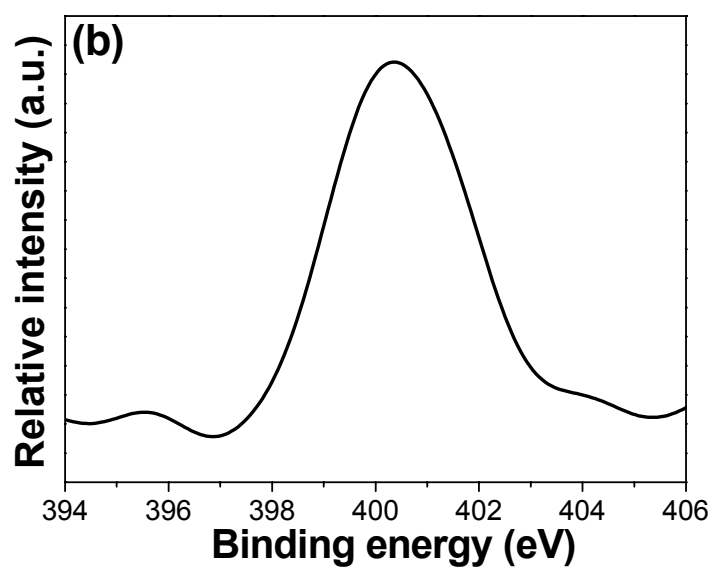

**Figure S4.** High-resolution XPS spectra of F1s (a) and N1s (b) of the TiO<sub>2</sub> hollow spheres prepared at  $R = 1$ .

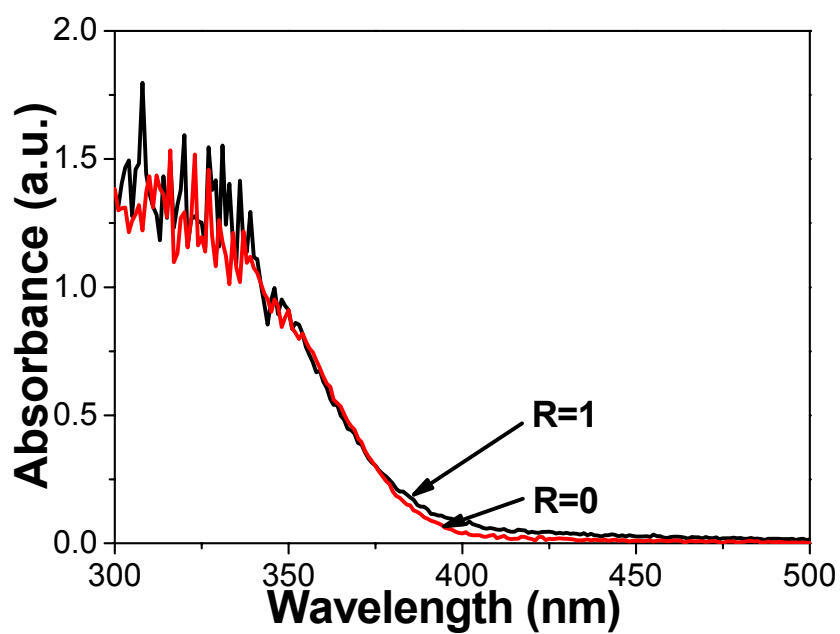

**Figure S5.** UV-vis absorption spectra of the samples prepared at  $R = 0$  and 1, respectively.
